# Supplementary material for: Effect of Surfactant Dynamics on Flow Patterns Inside Drops Moving in Rectangular Microfluidic Channels
Source: MDPI journal article supplement (doi:10.3390/colloids5030040), 2021-08-02
Supplement: s1 [file s1]

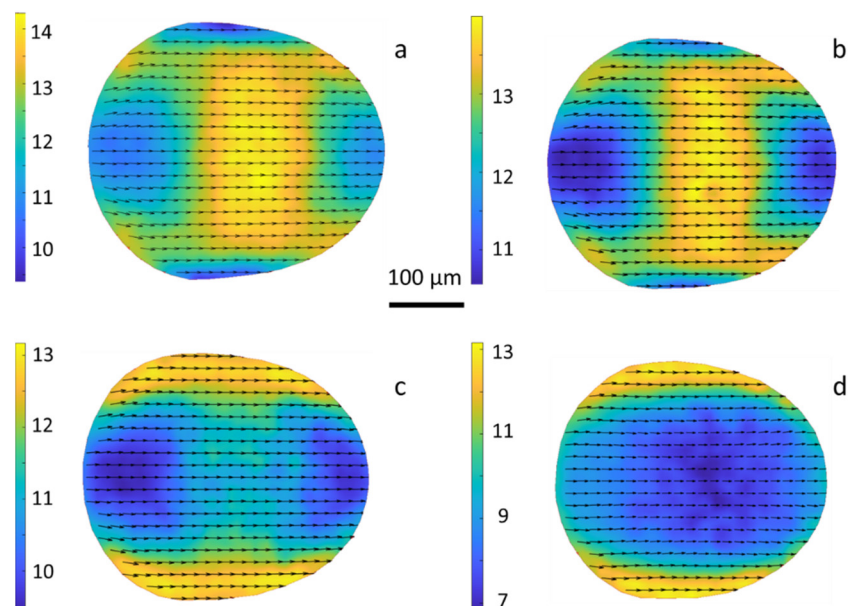

**Figure S1.** Flow fields inside a surfactant-free drop in the co-ordinate frame of channel: a – drop cross-section corresponding to the middle plane of channel, b – cross-section at 40  $\mu\text{m}$  from the middle plane, c –60  $\mu\text{m}$ , d –80  $\mu\text{m}$ . Drop length  $L = 396 \pm 3 \mu\text{m}$ , drop velocity  $V = 10.7 \pm 0.3 \text{ mm/s}$ . The velocity on colour scales is given in mm/s.

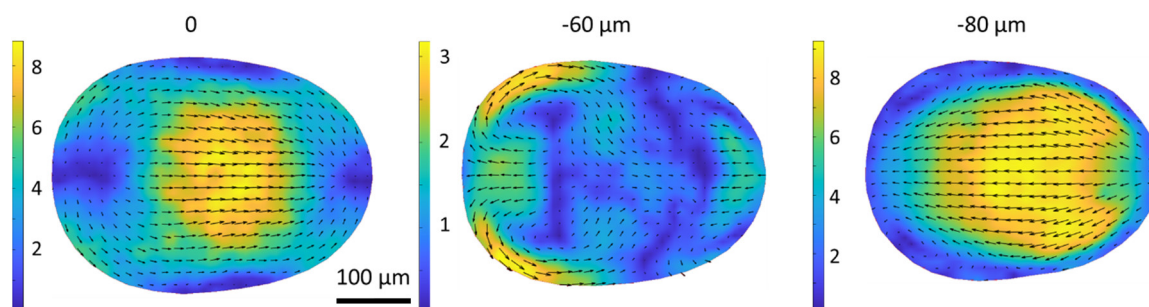

**Figure S2.** Flow fields inside a surfactant-free drop in the co-ordinate frame of drop. Total flow rate  $Q = 64 \mu\text{L/min}$ . Drop length  $L = 434 \pm 5 \mu\text{m}$ , drop velocity  $V = 21.9 \pm 0.5 \text{ mm/s}$ . The velocity on colour scales is given in mm/s.

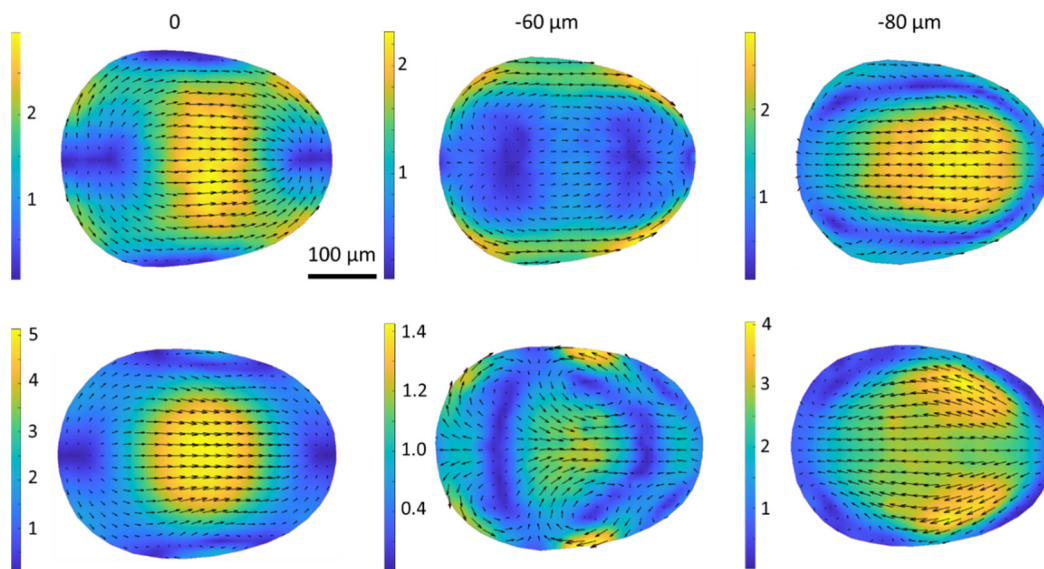

**Figure S3.** Comparison of flow patterns inside the drops laden by C10TAB: top panel  $c = 80 \text{ mM}$ ,  $L_d = 391 \mu\text{m}$ ,  $V = 10.6 \text{ mm/s}$ ; bottom panel  $c = 120 \text{ mM}$ ,  $L_d = 387 \mu\text{m}$ ,  $V = 11.4 \text{ mm/s}$ . The velocity on colour scales is given in mm/s.

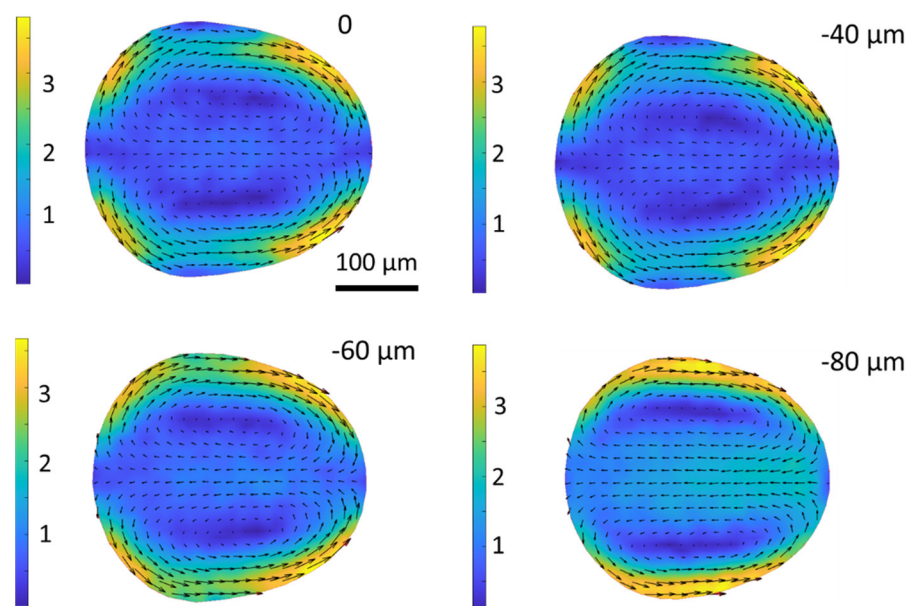

**Figure S4.** Flow fields in various cross-sections of 10 cmc (0.6 mM) Tween 20 drop,  $L_d = 372 \mu\text{m}$ ,  $V = 9.7 \text{ mm/s}$ . The velocity on colour scales is given in mm/s.
